# Supplementary material for: Influence of mole-ratio on the coordination behaviour of a ditopic N2O2S2-macrocycle: endo/exocyclic silver(i) coordination polymer exhibiting desolvation-induced SCSC transformation
Source: Royal Society of Chemistry journal article supplement (doi:10.1039/c7ce01540b), 2017-01-01
Supplement: c7ce01540b1.pdf [file c7ce01540b1.pdf]

## **Electronic supplementary information**

**for**

### **Influence of mole-ratio on the coordination behaviour of a ditopic N<sub>2</sub>O<sub>2</sub>S<sub>2</sub>-macrocyclic silver(I) coordination polymer exhibiting desolvation-induced SCSC transformation**

Sujin Seo, Eunji Lee, Huiyeong Ju, Seulgi Kim, In-Hyeok Park, Jong Hwa Jung, Shim Sung Lee\*

*Department of Chemistry and Research Institute of Natural Science,  
Gyeongsang National University, Jinju 52828, South Korea*

**Table S1** Crystal and experimental data

|                                                                                      | <b>1</b>                                                                                       | <b>2a</b>                                                                                                                                   | <b>2b</b>                                                                                                                   |
|--------------------------------------------------------------------------------------|------------------------------------------------------------------------------------------------|---------------------------------------------------------------------------------------------------------------------------------------------|-----------------------------------------------------------------------------------------------------------------------------|
| Formula                                                                              | C <sub>25</sub> H <sub>28</sub> AgF <sub>6</sub> N <sub>2</sub> O <sub>2</sub> PS <sub>2</sub> | C <sub>52</sub> H <sub>60</sub> Ag <sub>4</sub> Cl <sub>4</sub> F <sub>24</sub> N <sub>4</sub> O <sub>4</sub> P <sub>4</sub> S <sub>4</sub> | C <sub>25</sub> H <sub>28</sub> Ag <sub>2</sub> F <sub>12</sub> N <sub>2</sub> O <sub>2</sub> P <sub>2</sub> S <sub>2</sub> |
| Formula weight                                                                       | 705.45                                                                                         | 2086.44                                                                                                                                     | 958.29                                                                                                                      |
| Temperature                                                                          | 173(2)                                                                                         | 173(2)                                                                                                                                      | 173(2)                                                                                                                      |
| Crystal system                                                                       | Triclinic                                                                                      | Triclinic                                                                                                                                   | Monoclinic                                                                                                                  |
| Space group                                                                          | <i>P</i> -1                                                                                    | <i>P</i> -1                                                                                                                                 | <i>P</i> 2 <sub>1</sub> / <i>c</i>                                                                                          |
| <i>Z</i>                                                                             | 2                                                                                              | 2                                                                                                                                           | 4                                                                                                                           |
| <i>a</i> (Å)                                                                         | 7.9615(2)                                                                                      | 10.6576(5)                                                                                                                                  | 19.6427(5)                                                                                                                  |
| <i>b</i> (Å)                                                                         | 11.8938(3)                                                                                     | 17.0361(8)                                                                                                                                  | 10.2297(3)                                                                                                                  |
| <i>c</i> (Å)                                                                         | 14.6343(3)                                                                                     | 20.7041(9)                                                                                                                                  | 16.2000(4)                                                                                                                  |
| <i>α</i> (deg)                                                                       | 100.9770(10)                                                                                   | 83.502(2)                                                                                                                                   | 90                                                                                                                          |
| <i>β</i> (deg)                                                                       | 94.8970(10)                                                                                    | 76.853(2)                                                                                                                                   | 108.4080(10)                                                                                                                |
| <i>γ</i> (deg)                                                                       | 94.9310(10)                                                                                    | 73.030(2)                                                                                                                                   | 90                                                                                                                          |
| <i>V</i> (Å <sup>3</sup> )                                                           | 1348.02(6)                                                                                     | 3496.8(3)                                                                                                                                   | 3088.65(14)                                                                                                                 |
| <i>D</i> <sub>calc</sub> (g/cm <sup>3</sup> )                                        | 1.738                                                                                          | 1.982                                                                                                                                       | 2.061                                                                                                                       |
| 2 $\theta$ <sub>max</sub> (deg)                                                      | 54.00                                                                                          | 52.00                                                                                                                                       | 56.00                                                                                                                       |
| <i>R</i> <sub>1</sub> , <i>wR</i> <sub>2</sub> [ <i>I</i> > 2 $\sigma$ ( <i>I</i> )] | 0.0239, 0.0601                                                                                 | 0.0730, 0.1692                                                                                                                              | 0.0771, 0.2288                                                                                                              |
| <i>R</i> <sub>1</sub> , <i>wR</i> <sub>2</sub> [all data]                            | 0.0261, 0.0615                                                                                 | 0.1157, 0.1990                                                                                                                              | 0.0871, 0.2420                                                                                                              |
| Goodness-of-fit on <i>F</i> <sup>2</sup>                                             | 1.058                                                                                          | 1.018                                                                                                                                       | 1.061                                                                                                                       |
| No. of reflection used [ $>2\sigma(I)$ ]                                             | 5882 [ <i>R</i> <sub>int</sub> = 0.0242]                                                       | 13730 [ <i>R</i> <sub>int</sub> = 0.0769]                                                                                                   | 7458 [ <i>R</i> <sub>int</sub> = 0.0449]                                                                                    |
| Refinement                                                                           | full-matrix                                                                                    | full-matrix                                                                                                                                 | full-matrix                                                                                                                 |

**Table S2** Selected bond lengths (Å) and bond angles (°) for **1**

|           |          |           |          |
|-----------|----------|-----------|----------|
| Ag1-N1    | 2.352(1) | Ag1-N2    | 2.487(2) |
| Ag1-O1    | 2.896(1) | Ag1-O2    | 2.878(1) |
| Ag1-S1    | 2.593(2) | Ag1-S2    | 2.609(1) |
|           |          |           |          |
| N1-Ag1-N2 | 165.3(1) | N1-Ag1-O1 | 65.7(1)  |
| N1-Ag1-O2 | 62.6(1)  | N1-Ag1-S1 | 107.6(1) |
| N1-Ag1-S2 | 99.9(1)  | N2-Ag1-O1 | 129.0(1) |
| N2-Ag1-O2 | 103.0(1) | N2-Ag1-S1 | 79.9(1)  |
| N2-Ag1-S2 | 79.4(1)  | O1-Ag1-O2 | 127.2(1) |
| O1-Ag1-S1 | 72.6(1)  | O1-Ag1-S2 | 98.2(1)  |
| O2-Ag1-S1 | 133.2(1) | O2-Ag1-S2 | 81.1(1)  |
| S1-Ag1-S2 | 143.3(2) |           |          |

**Table S3** Selected bond lengths (Å) and bond angles (°) for **2a**

|           |          |            |          |
|-----------|----------|------------|----------|
| Ag1-N1    | 2.262(7) | Ag1-N2     | 2.354(9) |
| Ag1-O1    | 3.029(6) | Ag1-O2     | 2.924(6) |
| Ag1-S1    | 2.944(2) | Ag1-S2     | 2.833(2) |
| Ag2-S2    | 2.423(2) | Ag2-S3     | 2.418(2) |
| Ag3-N3    | 2.197(7) | Ag3-N4     | 2.231(7) |
| Ag3-O3    | 2.942(6) | Ag3-O4     | 3.141(6) |
| Ag3-S3    | 2.896(2) | Ag3-S4     | 3.079(2) |
| Ag4-S4    | 2.419(2) | Ag4-S1A    | 2.411(2) |
|           |          |            |          |
| N1-Ag1-N2 | 164.5(3) | N1-Ag1-O1  | 64.5(2)  |
| N1-Ag1-O2 | 66.4(2)  | N1-Ag1-S1  | 107.5(2) |
| N1-Ag1-S2 | 108.9(2) | N2-Ag1-O1  | 124.8(2) |
| N2-Ag1-O2 | 103.7(2) | N2-Ag1-S1  | 70.6(2)  |
| N2-Ag1-S2 | 76.7(2)  | N3-Ag3-N4  | 168.8(3) |
| N3-Ag3-O3 | 62.4(2)  | N3-Ag3-O4  | 67.4(2)  |
| N3-Ag3-S3 | 106.0(2) | N3-Ag3-S4  | 99.9(2)  |
| N4-Ag3-O3 | 123.6(2) | N4-Ag3-O4  | 106.6(2) |
| N4-Ag3-S3 | 78.7(2)  | N4-Ag3-S4  | 75.1(2)  |
| O1-Ag1-O2 | 130.9(2) | O1-Ag1-S1  | 64.9(1)  |
| O1-Ag1-S2 | 125.4(1) | O2-Ag1-S1  | 135.7(1) |
| O2-Ag1-S2 | 69.3(1)  | O3-Ag3-O4  | 129.7(2) |
| O3-Ag3-S3 | 68.3(1)  | O3-Ag3-S4  | 127.1(1) |
| O4-Ag3-S3 | 129.0(1) | O4-Ag3-S4  | 61.4(1)  |
| S1-Ag1-S2 | 142.5(1) | S2-Ag2-S3  | 161.6(1) |
| S3-Ag3-S4 | 153.8(1) | S4-Ag4-S1A | 169.9(1) |

Symmetry operations: (A)  $x-1, y+1, z$       (B)  $x+1, y-1, z$

**Table S4** Selected bond lengths (Å) and bond angles (°) for **2b**

|                                             |           |                        |           |
|---------------------------------------------|-----------|------------------------|-----------|
| Ag1-N1                                      | 2.296(11) | Ag1-N2                 | 2.410(12) |
| Ag1-O1                                      | 2.895(11) | Ag1-O2                 | 2.811(10) |
| Ag1-S1                                      | 2.787(3)  | Ag1-S2                 | 2.645(3)  |
| Ag2-S2                                      | 2.432(3)  | Ag2-S1A                | 2.506(3)  |
| Ag2-F1                                      | 2.45(3)   |                        |           |
| <hr/>                                       |           |                        |           |
| N1-Ag1-N2                                   | 161.9(4)  | N1-Ag1-O1              | 66.2(4)   |
| N1-Ag1-O2                                   | 64.7(4)   | N1-Ag1-S1              | 104.1(3)  |
| N1-Ag1-S2                                   | 110.9(3)  | N2-Ag1-O1              | 127.8(3)  |
| N2-Ag1-O2                                   | 103.9(3)  | N2-Ag1-S1              | 76.1(3)   |
| N2-Ag1-S2                                   | 78.8(3)   | O1-Ag1-O2              | 128.0(3)  |
| O1-Ag1-S1                                   | 66.1(2)   | O1-Ag1-S2              | 103.9(2)  |
| O2-Ag1-S1                                   | 143.0(2)  | O2-Ag1-S2              | 78.7(2)   |
| S1-Ag1-S2                                   | 135.5(1)  | S1A-Ag2-F1             | 86.2(9)   |
| S2-Ag2-S1A                                  | 140.3(1)  | S2-Ag2-F1              | 133.3(9)  |
| <hr/>                                       |           |                        |           |
| Symmetry operations: (A) $x, -y+3/2, z+1/2$ |           | (B) $x, -y+3/2, z-1/2$ |           |

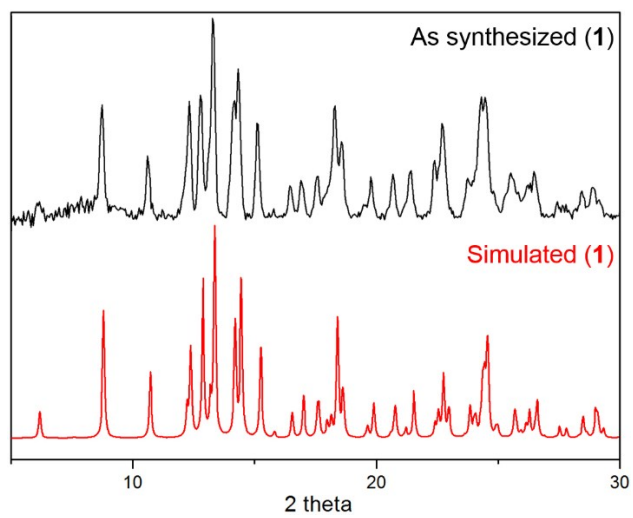

**Fig. S1** PXRD patterns of **1**.

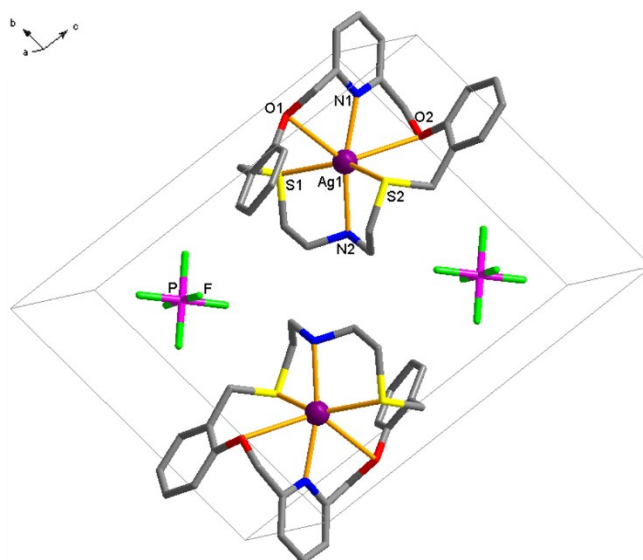

**Fig. S2** Crystal structure of the silver(I) hexafluorophosphate complex **1**, [Ag(L)]PF<sub>6</sub>.
